# Supplementary material for: Nutritional Quality of Conventional, Organic, and Hydroponic Tomatoes Commercialized in Quito, Ecuador
Source: MDPI journal article supplement (doi:10.3390/foods13091348), 2024-04-27
Supplement: s1 [file s1]

**Supplementary Table S1.** Results of calibration parameters from the determination of ascorbic acid, lycopene, total phenolics, and trace metals.

**Supplementary Table S2.** Recovery of analytes and relative standard deviation percentage of sample replicates.

| Analyte                      | Recovery (%)                                          | RSD (%)   |
|------------------------------|-------------------------------------------------------|-----------|
| Ascorbic acid <sup>1</sup>   | 89.01–111.01 <sup>a</sup>                             | 0.02–8.92 |
| Lycopene <sup>2</sup>        | 97.54–110.32 <sup>a</sup> / 92.38–109.53 <sup>b</sup> | 0.63–9.84 |
| Total phenolics <sup>3</sup> | 94.85–107.58 <sup>b</sup>                             | 0.29–5.70 |
| Copper <sup>3</sup>          | 120.32 <sup>c</sup>                                   | < 3.41    |
| Iron <sup>3</sup>            | 93.86–94.71 <sup>d</sup>                              | 0.37–5.66 |
| Manganese <sup>3</sup>       | 107.50–108.50 <sup>d</sup>                            | 0.37–5.90 |
| Zinc <sup>3</sup>            | 91.89 <sup>c</sup>                                    | 0.25–2.89 |
| Cadmium <sup>4</sup>         | 84.13–98.11 <sup>c</sup>                              | < 14.77   |
| Lead <sup>3</sup>            | 75.08–91.60 <sup>b</sup>                              | < 2.56    |

<sup>a</sup>spiked samples; <sup>b</sup>fortified samples; <sup>c</sup>certified reference material;  
<sup>d</sup>standard control  
RSD: relative standard deviation.  
AOAC (55) limits: <sup>1</sup>recovery 85–110%, RSD: 8%; <sup>2</sup>recovery: 80–115%, RSD: 11%; <sup>3</sup>recovery: 75–120%, RSD: 16%; <sup>4</sup>recovery: 70–125%, RSD: 32%.
